# Supplementary material for: An Emerging Mycoplasma Associated with Trichomoniasis, Vaginal Infection and Disease
Source: PubMed Central journal article supplement (PMC4206474; doi:10.1371/journal.pone.0110943), 2014-10-22

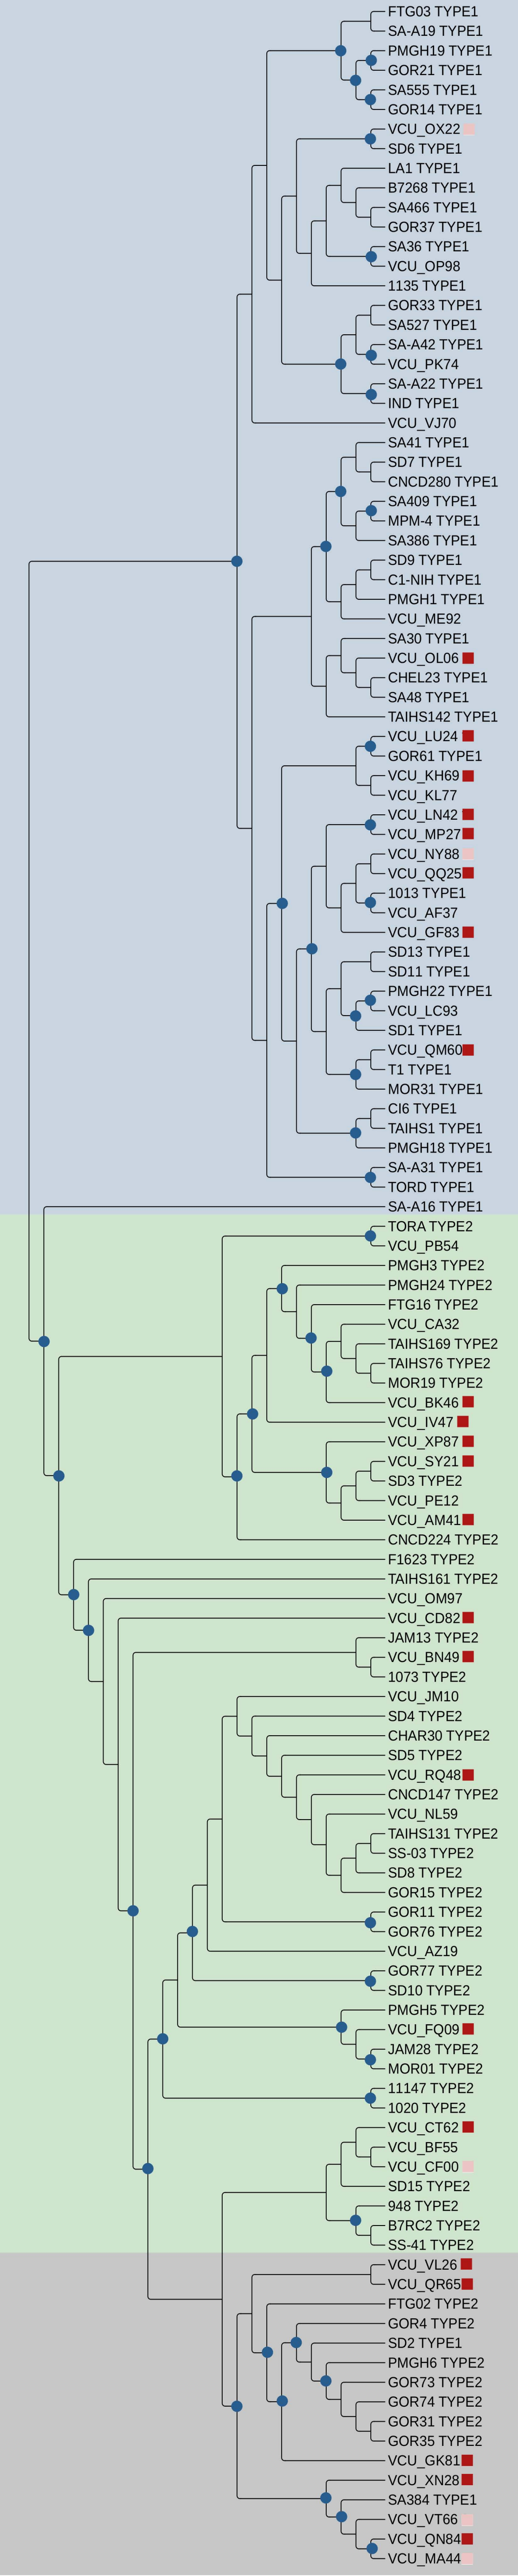

Supplement: pone.0110943.s003.pdf [file pone.0110943.s003.pdf]
