# Supplementary material for: An Emerging Mycoplasma Associated with Trichomoniasis, Vaginal Infection and Disease
Source: PubMed Central journal article supplement (PMC4206474; doi:10.1371/journal.pone.0110943), 2014-10-22
Supplement: pone.0110943.s004.pdf [file pone.0110943.s004.pdf]

**A**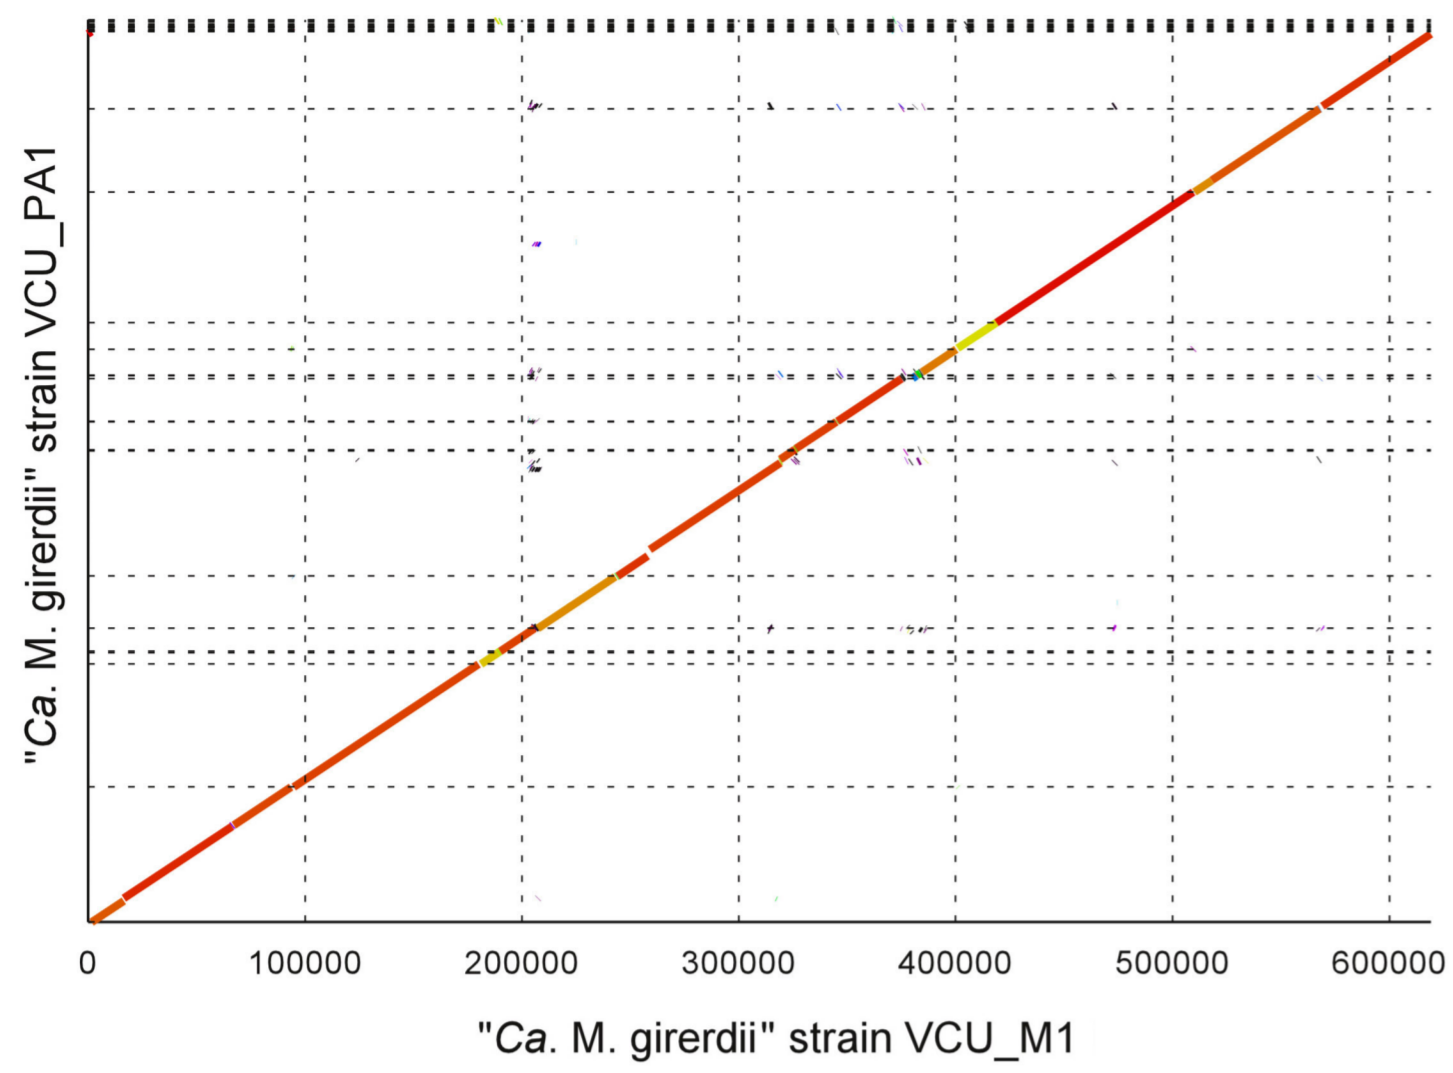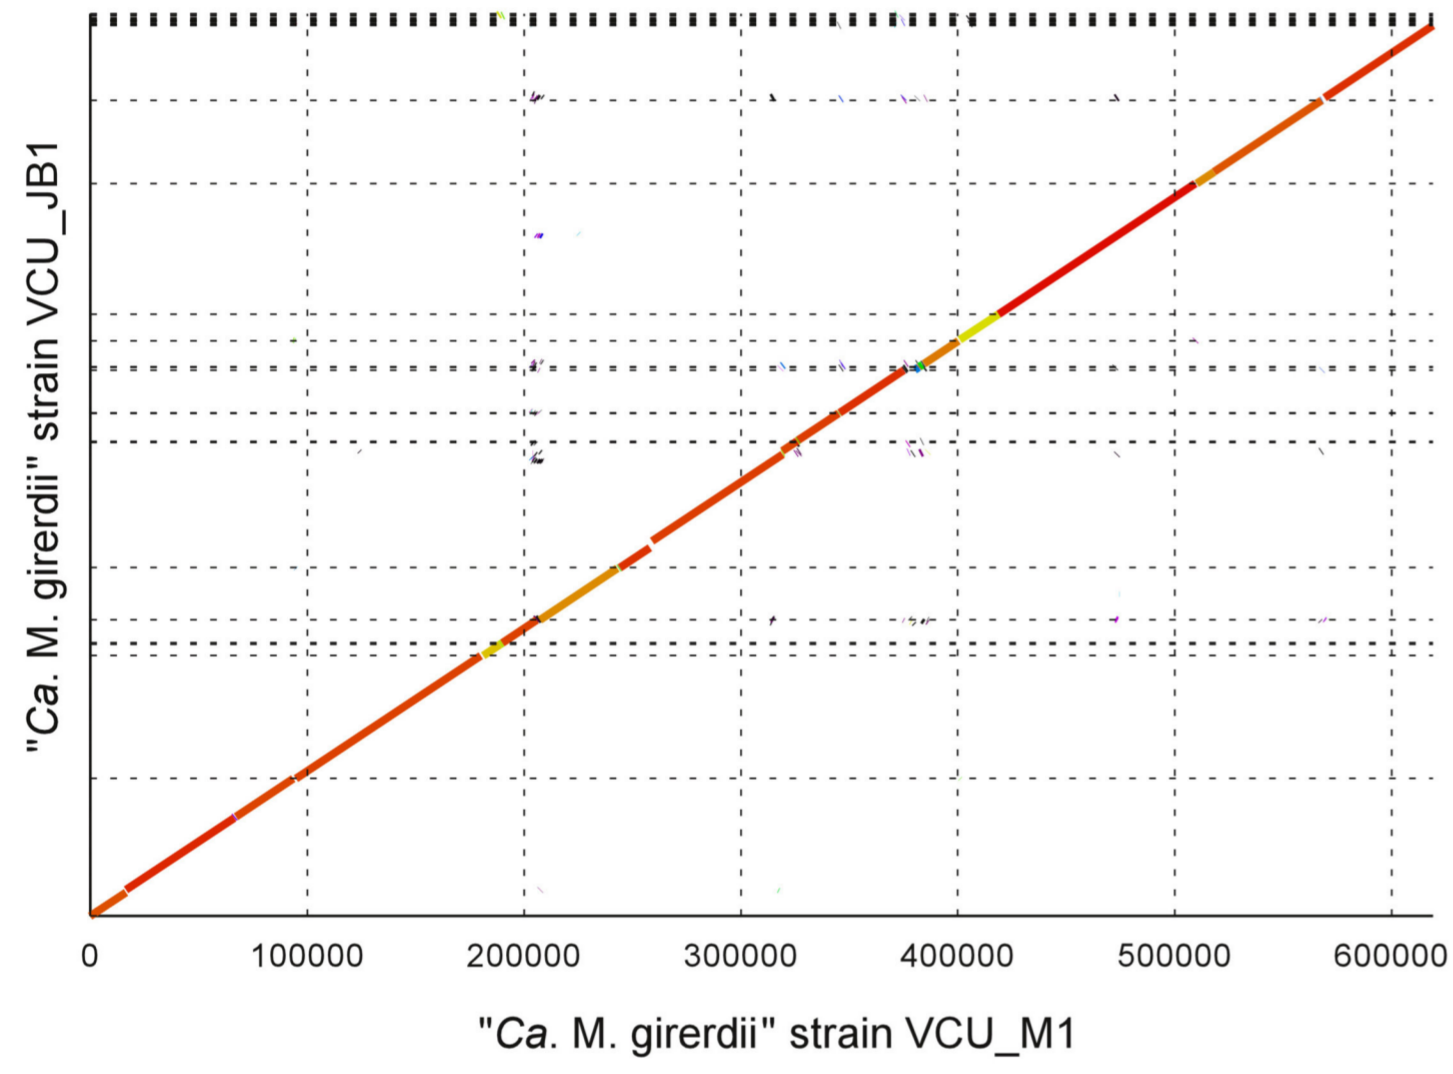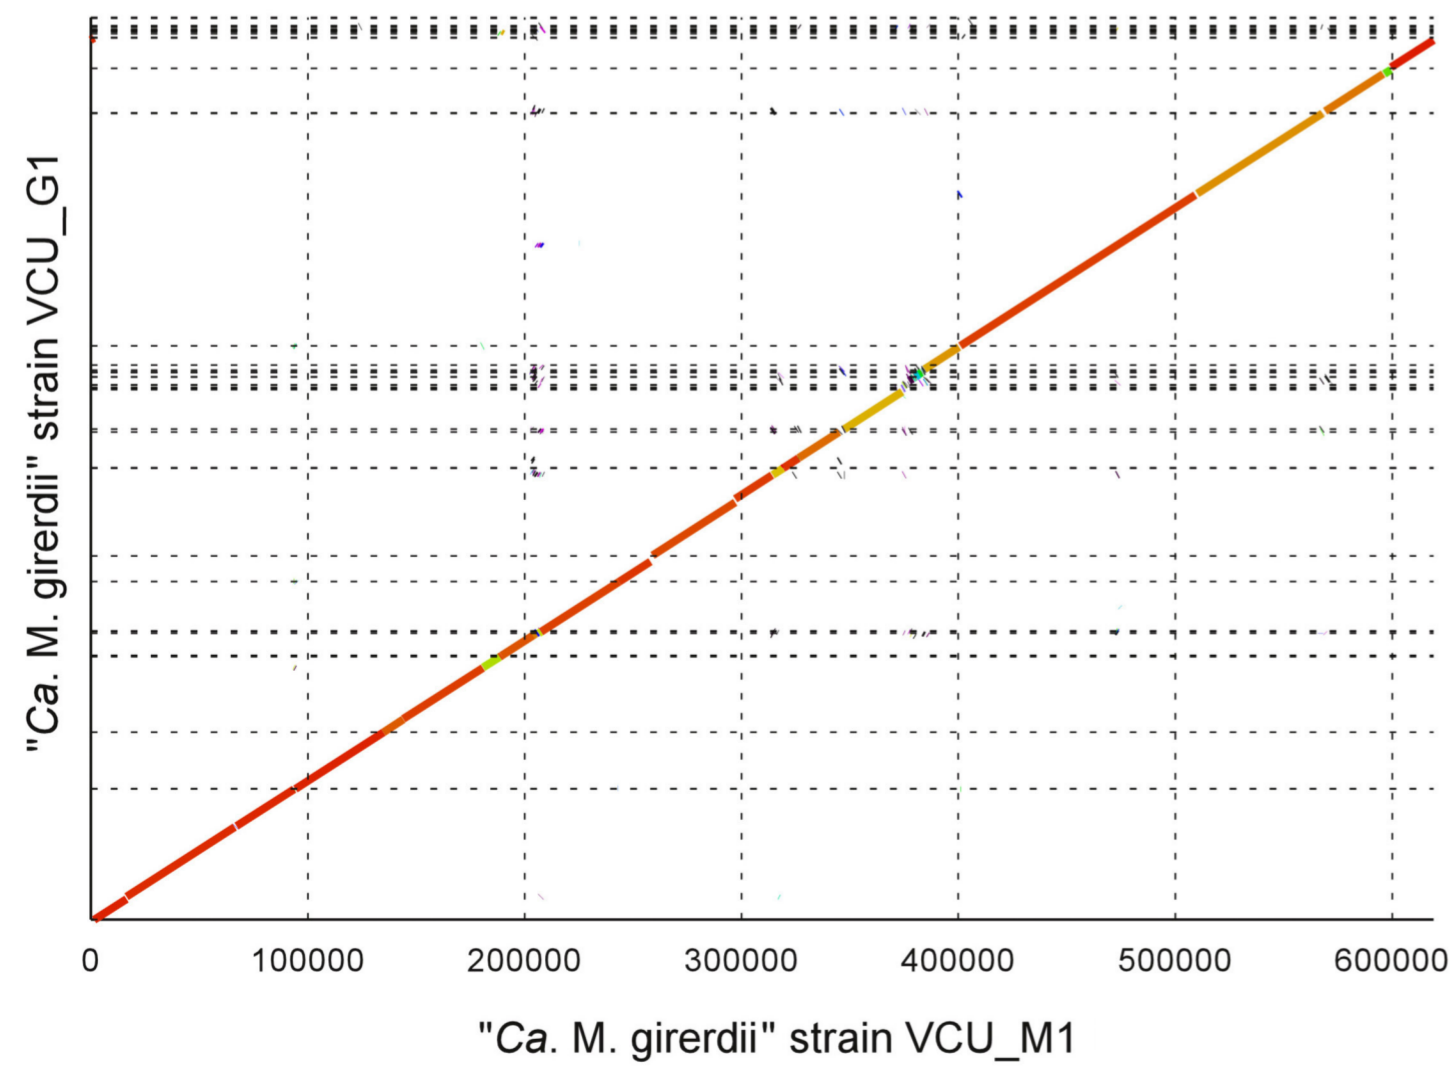

100 98 96 94 92 90

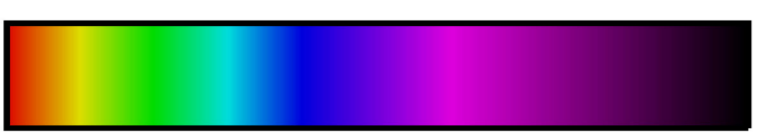

% nucleotide similarity

**B**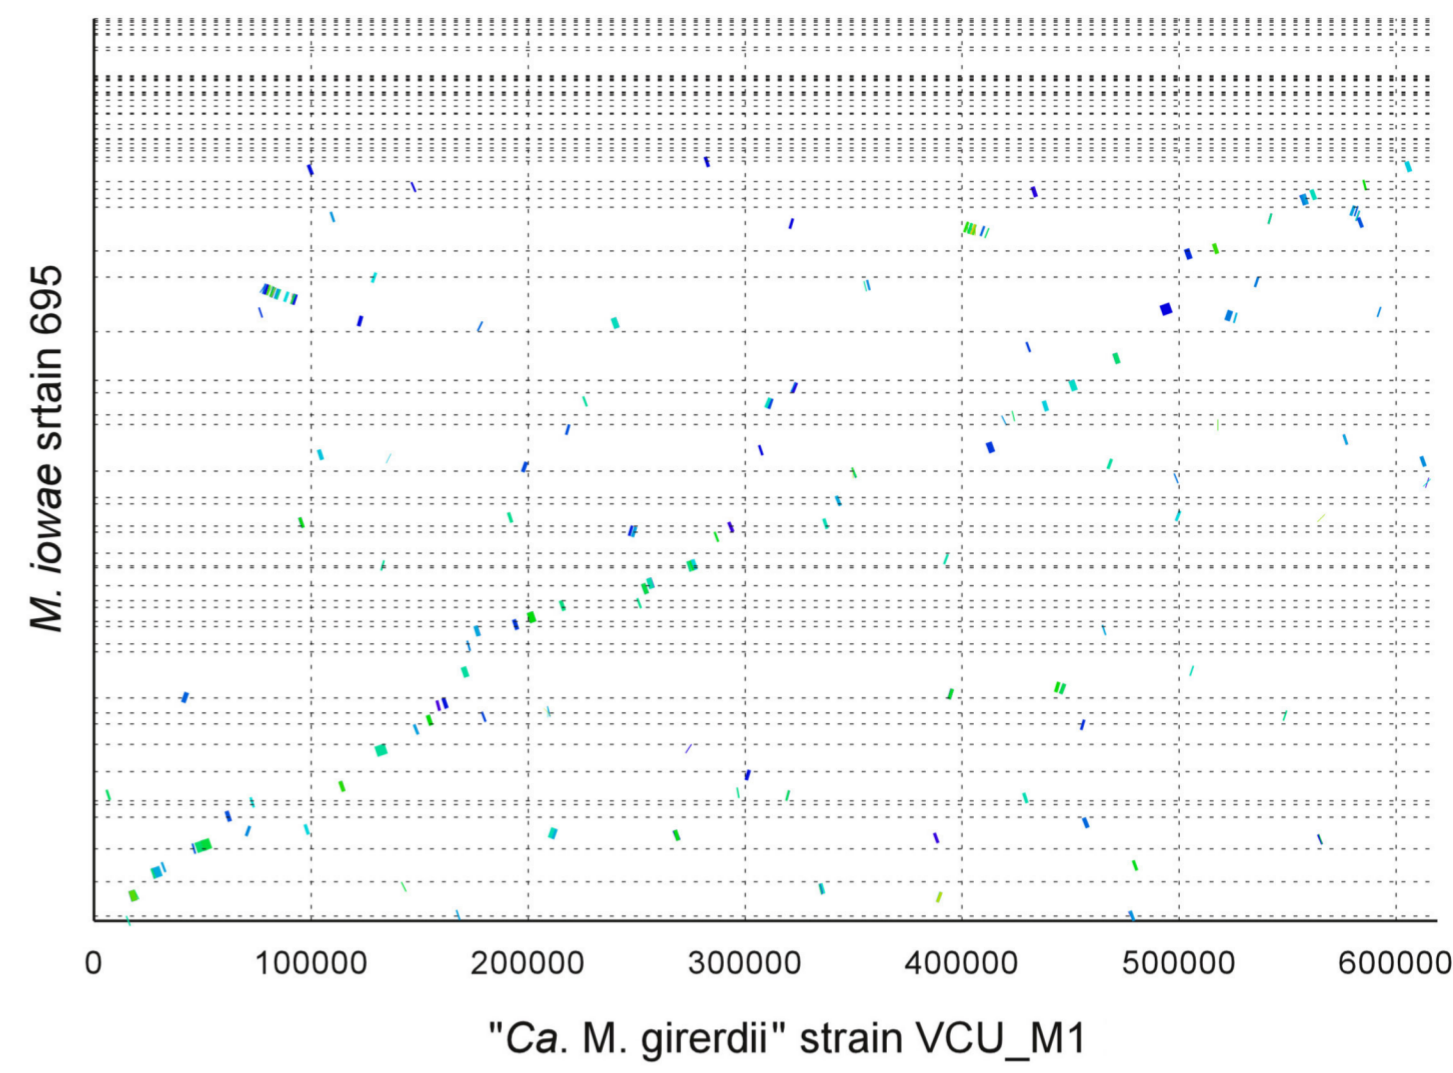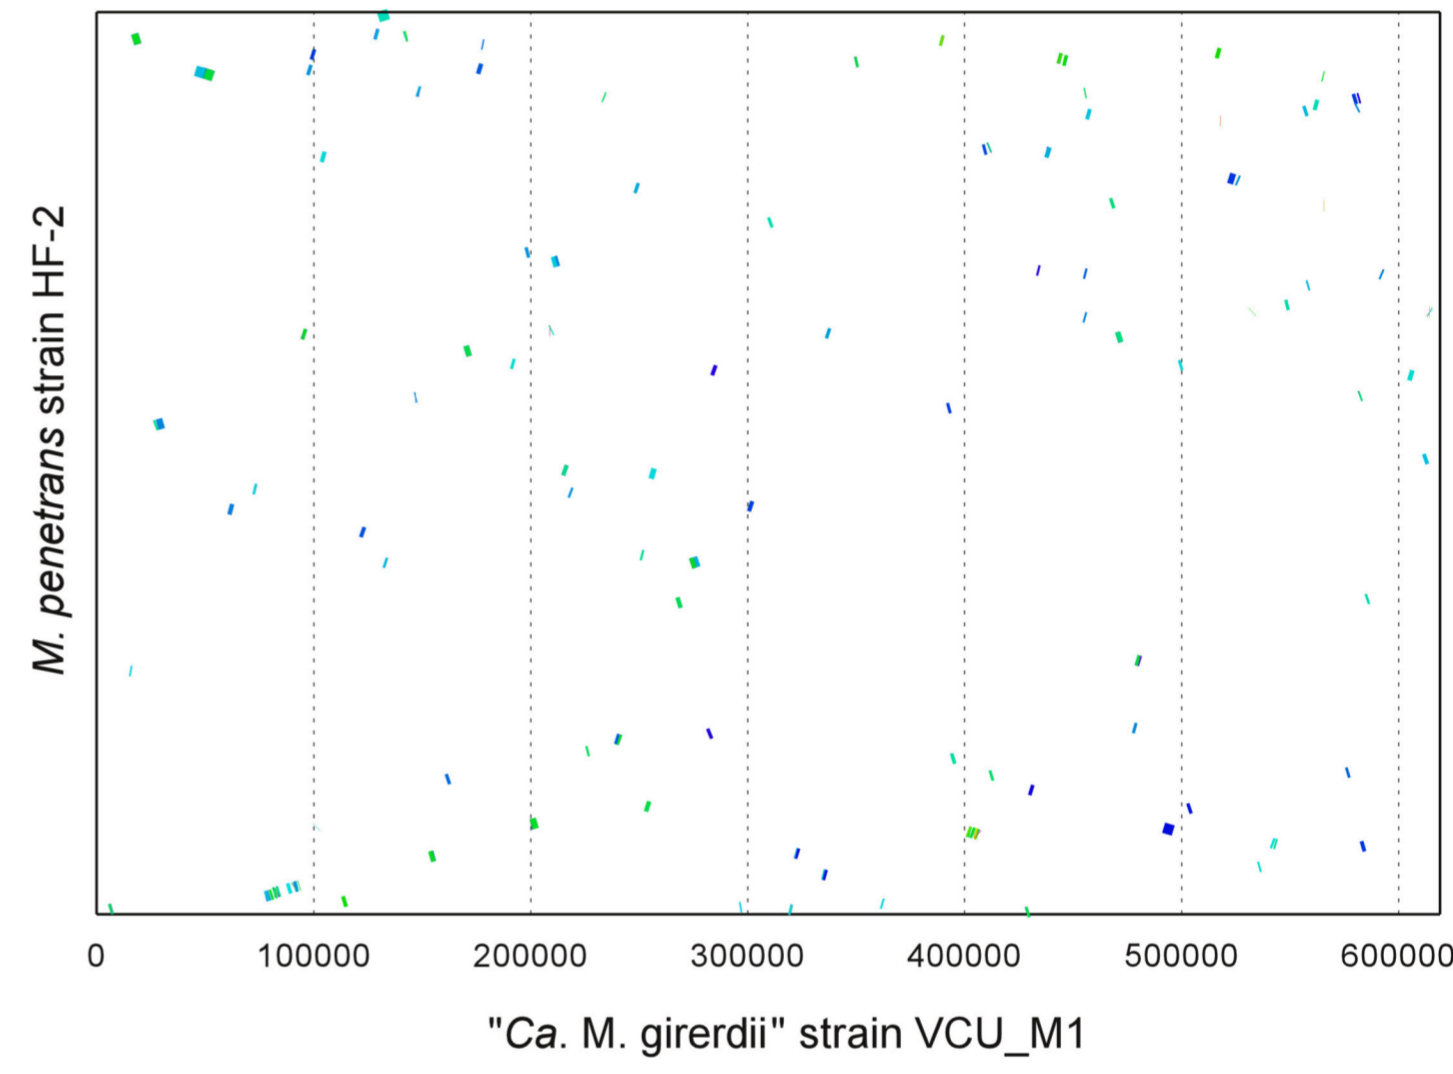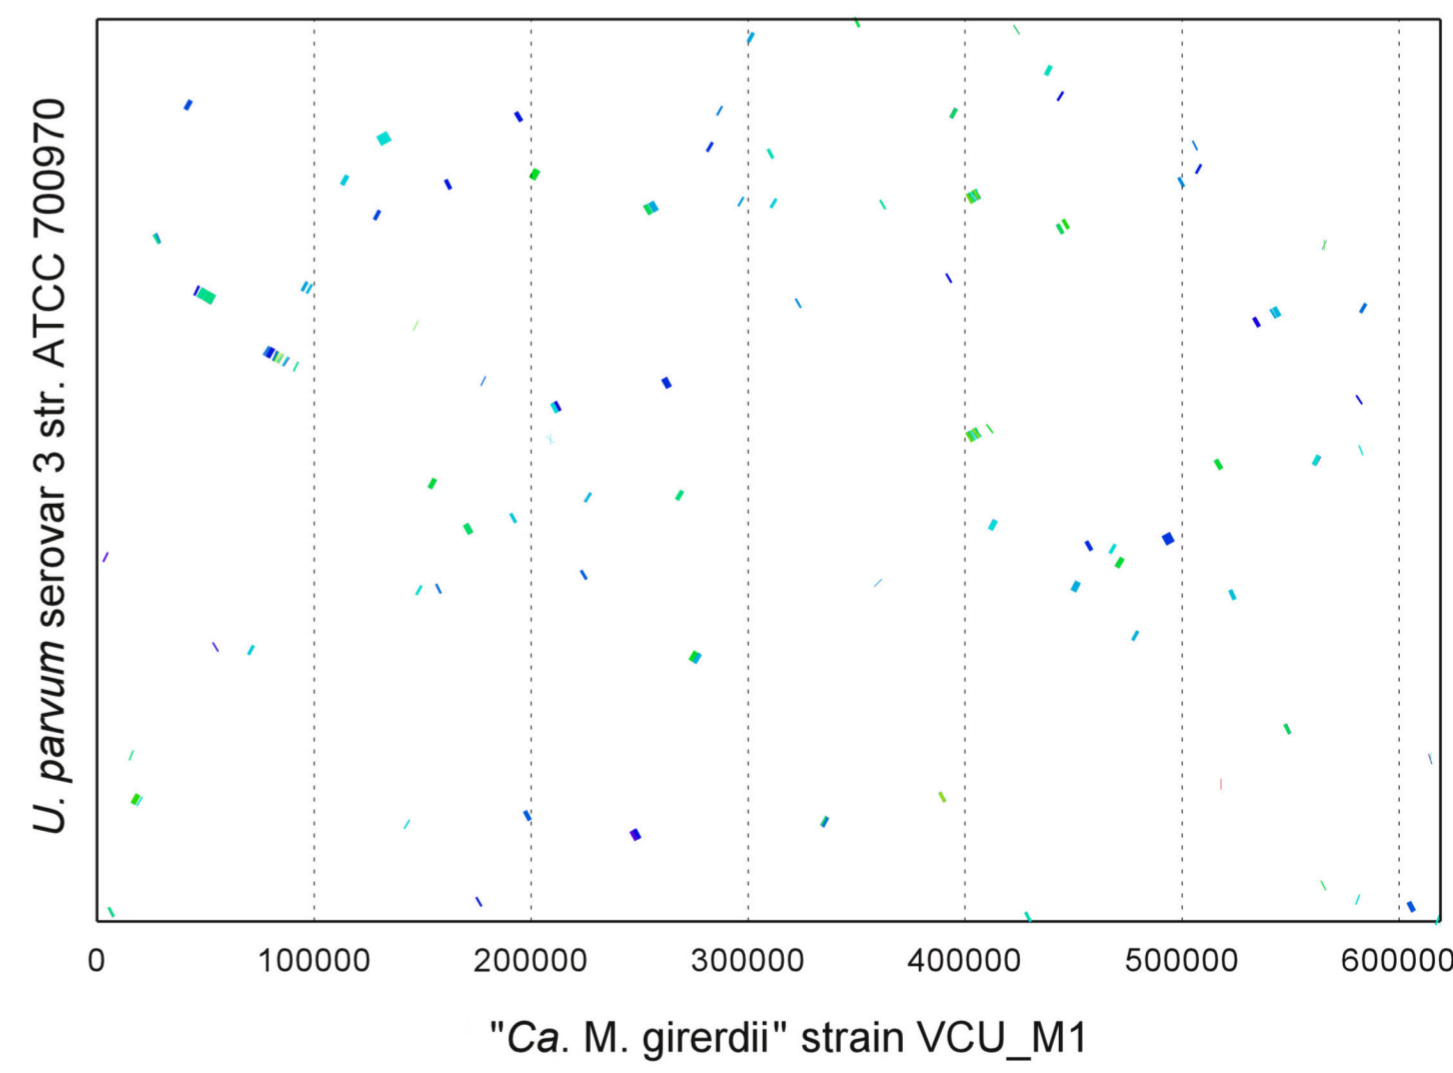

100 80 60 40 20 0

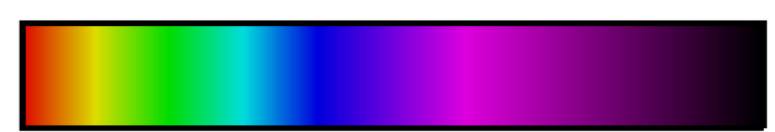

% amino acid similarity
